Cite this article as: Czerny M, Reser D, Eggebrecht H, Janata K, Sodeck G, Etz C *et al.* Aorto-bronchial and aorto-pulmonary fistulation after thoracic endovascular aortic repair: an analysis from the European Registry of Endovascular Aortic Repair Complications. *Eur J Cardiothorac Surg* 2015;48:252–7.

# Aorto-bronchial and aorto-pulmonary fistulation after thoracic endovascular aortic repair: an analysis from the European Registry of Endovascular Aortic Repair Complications

Martin Czerny<sup>a,\*</sup>, Diana Reser<sup>a,†</sup>, Holger Eggebrecht<sup>b</sup>, Karin Janata<sup>c</sup>, Gottfried Sodeck<sup>c</sup>, Christian Etz<sup>d</sup>, Maximilian Luehr<sup>d</sup>, Fabio Verzini<sup>e</sup>, Diletta Loschi<sup>e</sup>, Roberto Chiesa<sup>f</sup>, Germano Melissano<sup>f</sup>, Andrea Kahlberg<sup>f</sup>, Philippe Amabile<sup>g</sup>, Wolfgang Harringer<sup>h</sup>, Rolf Alexander Janosi<sup>i</sup>, Raimund Erbel<sup>j</sup>, Jürg Schmidli<sup>j</sup>, Piergiorgio Tozzi<sup>k</sup>, Yutaka Okita<sup>l</sup>, Ludovic Canaud<sup>m</sup>, Ali Khoynezhad<sup>n</sup>, Gabriele Maritati<sup>o</sup>, Piergiorgio Cao<sup>p</sup>, Tilo Kölbel<sup>q</sup> and Santi Trimarchi<sup>r</sup>

<sup>a</sup> Department of Cardiovascular Surgery, University Hospital Zurich, Zurich, Switzerland

<sup>b</sup> Cardioangiological Center Bethanien, Frankfurt, Germany

<sup>c</sup> Department of Emergency Medicine, Medical University of Vienna, Vienna, Austria

<sup>d</sup> Heart Center Leipzig, Leipzig, Germany

<sup>e</sup> Vascular and Endovascular Surgery Unit, Hospital S. Maria Misericordia, Perugia, Italy

<sup>f</sup> Department of Vascular Surgery, Scientific Institute H San Raffaele, Milan, Italy

<sup>g</sup> Department of Interventional Radiology, AP-HM-Hôpital Nord, Marseille, France

<sup>h</sup> Department of Cardiovascular and Thoracic Surgery, Braunschweig, Germany

<sup>i</sup> Department of Cardiology, West-German Heart Center Essen, Essen, Germany

<sup>j</sup> Department of Cardiovascular Surgery, Inselspital, University Hospital Berne, Berne, Switzerland

<sup>k</sup> Department of Cardiac Surgery, CHUV, Lausanne, Switzerland

<sup>l</sup> University, Division of Cardiovascular Surgery, Kobe University, Kobe, Japan

<sup>m</sup> Department of Vascular and Thoracic Surgery, Arnaud de Villeneuve Hospital, Montpellier, France

<sup>n</sup> Division of Cardiothoracic Surgery Cedars Sinai Medical Center, Los Angeles, CA, USA

<sup>o</sup> The Leeds Teaching Hospitals NHS Trust, Leeds, UK

<sup>p</sup> San Camillo Hospital, Rome, Italy

<sup>q</sup> Universitäres Herzzentrum Hamburg, Hamburg, Germany

<sup>r</sup> IRCCS Policlinico San Donato, Thoracic Aortic Research Center, Milan, Italy

\* Corresponding author. Department of Cardiovascular Surgery, University Hospital Zurich, Rämistrasse 100, 8091 Zurich, Switzerland. Tel: +41-442-551804; fax: +41-442-554467; e-mail: martin.czerny@usz.ch (M. Czerny).

Received 19 August 2014; received in revised form 30 September 2014; accepted 16 October 2014

## Abstract

**OBJECTIVES:** To learn upon incidence, underlying mechanisms and effectiveness of treatment strategies in patients with central airway and pulmonary parenchymal aorto-bronchial fistulation after thoracic endovascular aortic repair (TEVAR).

**METHODS:** Analysis of an international multicentre registry (European Registry of Endovascular Aortic Repair Complications) between 2001 and 2012 with a total caseload of 4680 TEVAR procedures (14 centres).

**RESULTS:** Twenty-six patients with a median age of 70 years (interquartile range: 60–77) (35% female) were identified. The incidence of either central airway (aorto-bronchial) or pulmonary parenchymal (aorto-pulmonary) fistulation (ABPF) in the entire cohort after TEVAR in the study period was 0.56% (central airway 58%, peripheral parenchymal 42%). Atherosclerotic aneurysm formation was the leading indication for TEVAR in 15 patients (58%). The incidence of primary endoleaks after initial TEVAR was  $n = 10$  (38%), of these 80% were either type I or type III endoleaks. Fourteen patients (54%) developed central left bronchial tree lesions, 11 patients (42%) pulmonary parenchymal lesions and 1 patient (4%) developed a tracheal lesion. The recognized mechanism of ABPF was external compression of the bronchial tree in 13 patients (50%), the majority being due to endoleak formation, further ischaemia due to extensive coverage of bronchial feeding arteries in 3 patients (12%). Inflammation and graft erosion accounted for 4 patients (30%) each. Cumulative survival during the entire study period was 39%. Among deaths, 71% were attributed to ABPF. There was no difference in survival in patients having either central airway or pulmonary parenchymal ABPF (33 vs 45%, log-rank  $P = 0.55$ ). Survival with a radical surgical approach was significantly better when compared with any other treatment strategy in terms of overall survival (63 vs 32% and 63 vs 21% at 1 and 2 years, respectively), as well as in terms of fistula-related survival (63 vs 43% and 63 vs 43% at 1 and 2 years, respectively).

<sup>†</sup>The first two authors contributed equally to this work.

**CONCLUSIONS:** ABPF is a rare but highly lethal complication after TEVAR. The leading mechanism behind ABPF seems to be a continuing external compression of either the bronchial tree or left upper lobe parenchyma. In this setting, persisting or newly developing endoleak formation seems to play a crucial role. Prognosis does not differ in patients with central airway or pulmonary parenchymal fistulation. Radical bronchial or pulmonary parenchymal repair in combination with stent graft removal and aortic reconstruction seems to be the most durable treatment strategy.

**Keywords:** Thoracic endovascular aortic repair • Aorto-bronchial fistulation • Complications • Treatment

## INTRODUCTION

Since its broad introduction in the late 1990s, thoracic endovascular aortic repair (TEVAR) has gained widespread acceptance for the treatment of various types of acute and chronic thoracic aortic pathology [1–3]. However, as indications were further broadened, several limitations of and complications by the method became apparent [4–6]. Some of these are very rare, reports are merely anecdotal and it is difficult to develop an algorithm to understand, anticipate and thereby prevent them [7–9]. One of these complications is aorto-bronchial or aorto-pulmonary fistulation (ABPF) after TEVAR presenting either as central airway (aorto-bronchial) or as pulmonary parenchymal (aorto-pulmonary) fistulation [10–13].

The aim of this study was to learn upon incidence, underlying mechanisms and effectiveness of treatment strategies in patients with ABPF after TEVAR.

## METHODS

### Patients

The records of 26 patients having developed ABPF after TEVAR between 2001 and 2012 were analysed. The median age was 70 years [interquartile range (IQR): 60–77]. The cumulative caseload of all 14 participating centres in this time period was 4680. Thirty-five percent of patients were female and 42% had already undergone any kind of previous open aortic surgery in various segments. The primary underlying aortic pathology for TEVAR was thoracic aortic aneurysm formation in 58% of patients.

### Definition of aorto-bronchial or aorto-pulmonary fistulation

ABPF was defined as any communication between the thoracic aorta and the central airways or the pulmonary parenchyma post-TEVAR. Patients where ABPF could have been already present at the time of TEVAR or patients having native ABPF, either due to the underlying aortic pathology or due to any other reasons, were excluded.

### Parameters

From the patients' charts, individual clinical data, including any kind of previous aortic surgery, underlying aortic pathology and extension of aortic disease were collected. Procedural data included the index TEVAR procedure, elective or emergent intervention, number of prostheses, covered length and landing zones according to current definitions. Additionally, detailed variables included the presence or absence of mediastinal haematoma at the time of TEVAR, the time

interval between TEVAR and the diagnosis of ABPF, clinical symptoms, diagnostic modalities, treatment strategies, survival and causes of death.

## Statistical methods

Continuous data are presented as the median and IQR (range from the 25th to the 75th percentile). Discrete data are given as counts and percentages. In regard to the fortunate rare incidence of this particular complication, we intentionally did not perform extensive statistical comparisons between treatment groups or forced data into regression analysis, as these procedures would have resulted in extensive confidence intervals of no obvious clinical benefit. However, despite the known clinical heterogeneity between centres, we tried to answer two clinical questions by statistical means by forming two groups of daily clinical interest: one, the impact of the localization of a fistula, and second, if patients at risk might benefit from a radical 'one-stop-show' approach. Overall and fistula-related survival were assessed via the method by Kaplan and Meier. Calculations were performed with SPSS 20.0 for Mac OsX (IBM SPSS, Inc., NY, USA).

## RESULTS

### Incidence and prevalence

Out of 4680 patients, 26 patients with newly developed ABPF after TEVAR were identified. The prevalence was 0.56% (range: 0.12–3.31). The incidence was 0.40/1000 interventions/year (range: 0.08–2.36).

### Patient demographics

Descriptive characteristics of the patient cohort are given in Table 1. Eleven patients (42%) had already previous aortic repair in various segments (Table 1). Atherosclerotic aneurysm formation was the most frequent indication for TEVAR  $n = 15$  (58%) (Table 1).

### Index thoracic endovascular aortic repair procedure and lesion diameter

Operative data of the ABPF cohort at the time of primary TEVAR are given in Table 2. Half of the patients ( $n = 13$ ) underwent emergency TEVAR. Among the ABPF group, several different landing zones were present, necessitating arch vessel overstenting in 35% of cases (Table 2). The median covered length was 152 mm (IQR: 150–200). Eight patients (31%) had a mediastinal haematoma at the time of TEVAR (Table 2). Of 15 patients having undergone

**Table 1:** Descriptive characteristics of the cohort

|                                             | N overall = 26 |
|---------------------------------------------|----------------|
| Demographics                                |                |
| Age, median (IQR)                           | 70 (60–77)     |
| Female, n (%)                               | 9 (35)         |
| Chronic health conditions and risk factors  |                |
| Hypertension, n (%)                         | 20 (77)        |
| Coronary artery disease, n (%)              | 6 (23)         |
| Pulmonary disease, n (%)                    | 8 (31)         |
| Renal disease, n (%)                        | 3 (12)         |
| Previous CABG, n (%)                        | 1 (4)          |
| Previous aortic surgery/intervention, n (%) | 11 (42)        |
| Ascending aortic replacement, n (%)         | 2 (18)         |
| Aortic arch replacement, n (%)              | 3 (27)         |
| Descending aortic replacement, n (%)        | 5 (46)         |
| Abdominal aortic replacement, n (%)         | 4 (36)         |
| Underlying pathology                        |                |
| Aneurysm, n (%)                             | 15 (58)        |
| Chronic type B aortic dissection, n (%)     | 4 (15)         |
| Penetrating atherosclerotic ulcer, n (%)    | 1 (4)          |
| Anastomotic aneurysm, n (%)                 | 1 (4)          |
| Traumatic aortic injury, n (%)              | 4 (15)         |
| Intramural haematoma, n (%)                 | 1 (4)          |

Unless otherwise indicated, data are number (percentage).  
IQR: interquartile range.

**Table 2:** Initial interventional characteristics of the cohort

|                                                  | N overall = 26 |
|--------------------------------------------------|----------------|
| Initial procedure                                |                |
| Emergency, (%)                                   | 13 (50)        |
| Overstenting of arch vessels, n (%)              | 9 (35)         |
| Previous vessel transposition, n (%)             | 4 (15)         |
| Proximal bare metal springs, n (%)               | 21 (81)        |
| Criado zone 0, n (%)                             | 4 (15)         |
| Criado zone 1, n (%)                             | 2 (8)          |
| Criado zone 2, n (%)                             | 6 (23)         |
| Criado zone 3, n (%)                             | 12 (46)        |
| Criado zone 4, n (%)                             | 2 (8)          |
| Stent coverage                                   |                |
| Number of prostheses, median (range)             | 1 (1–2)        |
| Coverage in mm, median (IQR)                     | 152 (150–200)  |
| Oversizing factor in percentages, median (range) | 15 (7–20)      |
| TEVAR extending below TA transition, n (%)       | 4 (15%)        |
| Mediastinal haematoma at diagnosis, n (%)        | 8 (31%)        |
| Intraoperative hypotension, n (%)                | 1 (4%)         |

Unless otherwise indicated, data are number (percentage).  
IQR: interquartile range.

TEVAR for atherosclerotic aneurysm formation, 7 underwent elective TEVAR. Their median aneurysm sac diameter was 9.2 cm. The remaining patients underwent emergency TEVAR with a median sac diameter of 5.6 cm.

## Perioperative data

Acute kidney injury was seen in 2 patients (8%) and 8 patients (31%) required prolonged intubation. Ten patients (38%) had

**Table 3:** Presentation of ABPF

|                                                  | N overall = 26 |
|--------------------------------------------------|----------------|
| Timing and coincidence with ABPF                 |                |
| Days since initial TEVAR procedure, median (IQR) | 310 (28–1065)  |
| Simultaneous aorto-esophageal fistulation, n (%) | 3 (12%)        |
| Clinical presentation                            |                |
| Fever of unknown origin, n (%)                   | 7 (27%)        |
| Haematemesis, n (%)                              | 15 (58%)       |
| Haemoptysis, n (%)                               | 24 (92%)       |
| Shock, n (%)                                     | 6 (23%)        |
| Pain, n (%)                                      | 4 (15%)        |
| Dyspnoea, n (%)                                  | 7 (27%)        |
| Other, n (%)                                     | 4 (15%)        |
| Diagnostics                                      |                |
| Computed tomography, n (%)                       | 23 (89%)       |
| MRI, n (%)                                       | 1 (4%)         |
| Confirmation via endoscopy, n (%)                | 13 (50%)       |
| Serum CRP (C-reactive protein) levels (mg/dl)    | 4.5 (0.8–7.8)  |

Unless otherwise indicated, data are number (percentage).  
IQR: interquartile range.

persisting endoleaks after TEVAR. The majority (80%) were type I and type III endoleaks.

## Presentation of aorto-bronchial or aorto-pulmonary fistulation

The median time interval between the initial TEVAR procedure and the development of ABPF was 310 days (IQR: 28–1065). Three patients developed simultaneous aorto-oesophageal fistulation (Table 3). Twenty-four patients (92%) had haemoptysis as leading clinical sign. The diagnosis was confirmed by computed tomography (CT) in 23 patients (89%) with additional endoscopy in 13 patients (50%) (Table 3).

## Diagnostic information and recognized mechanisms of aorto-bronchial or aorto-pulmonary fistulation

Periaortic haematoma was the leading sign on CT scans (65%) followed by periaortic air (39%) and lung haemorrhage (31%) (Table 4). Fourteen patients (54%) developed central left bronchial tree fistulation, 11 patients (42%) developed pulmonary parenchymal fistulation and 1 patient (4%) developed tracheal fistulation (Table 4). External compression of the bronchial tree was the recognized mechanism of ABPF in 13 patients (50%) whereas persisting or newly developing endoleaks were common in contributing (Table 4). An ischaemic aetiology mainly due to overstenting of feeding bronchial arteries was the recognized mechanism in 3 patients (12%) followed by inflammation and graft erosion in 4 patients (30%) each.

## Management

Ten patients (39%) were deemed fit for open repair. A conservative strategy was chosen in 5 patients (19%). Redo-TEVAR as the

**Table 4:** Diagnostic information

|                                               | N overall = 26 |
|-----------------------------------------------|----------------|
| Findings by imaging                           |                |
| Periaortic haematoma, n (%)                   | 17 (65%)       |
| Periaortic air, n (%)                         | 10 (39%)       |
| Lung haemorrhage, n (%)                       | 8 (31%)        |
| Lung consolidation, n (%)                     | 7 (27%)        |
| Haemothorax, n (%)                            | 5 (19%)        |
| Bronchial wall erosion, n (%)                 | 2 (8%)         |
| Mediastinal haematoma, n (%)                  | 4 (15%)        |
| Localization of ABPF                          |                |
| Central left bronchial tree, n (%)            | 14 (54%)       |
| Pulmonary parenchyma, n (%)                   | 11 (42%)       |
| Trachea, n (%)                                | 1 (4%)         |
| Recognized mechanism of ABPF                  |                |
| External compression of bronchial tree, n (%) | 13 (50%)       |
| Ischaemic, n (%)                              | 3 (12%)        |
| Inflammation, n (%)                           | 4 (15%)        |
| Graft erosion, n (%)                          | 4 (15%)        |
| Endoleak, n (%)                               | 9 (35%)        |

**Table 5:** Management and outcome of ABPF

|                                                                                              | N overall = 26 |
|----------------------------------------------------------------------------------------------|----------------|
| Clinical assessment                                                                          |                |
| Fit for open repair, n (%)                                                                   | 10 (39)        |
| Management                                                                                   |                |
| Conservative, n (%)                                                                          | 5 (19)         |
| TEVAR, n (%)                                                                                 | 7 (27)         |
| Bronchial or pulmonary parenchymal repair, no aortic treatment, n (%)                        | 2 (8)          |
| Bronchial or pulmonary parenchymal repair, TEVAR, n (%)                                      | 2 (8)          |
| Bronchial or pulmonary parenchymal repair, stent graft removal, aortic reconstruction, n (%) | 8 (30)         |
| Bronchial repair and oesophagectomy, n (%)                                                   | 1 (4)          |
| Carotideo-carotid bypass and tracheal stenting                                               | 1 (4)          |
| Outcome                                                                                      |                |
| Survival, n (%)                                                                              | 10 (39)        |
| Death related to ABPF, n (%)                                                                 | 12 (71)        |

Unless otherwise indicated, data are number (percentage).

only treatment strategy was followed in 7 patients (27%). Bronchial and/or pulmonary parenchymal repair without any aortic repair was performed in 2 patients (8%) whereas bronchial and/or pulmonary parenchymal repair in combination with redo-TEVAR was done in another 2 patients (8%). Bronchial and/or pulmonary parenchymal repair, stent graft removal and aortic reconstruction were performed in 8 patients (30%). Finally bronchial repair and oesophagectomy and carotid-carotid bypass with tracheal stenting were performed in 1 patient each (8%) (Table 5).

## Outcome and follow-up

Overall survival was 39%. Twelve deaths (71%) were ABPF-related. There was no difference in survival with regard to central bronchial or pulmonary parenchymal fistulations (33 vs 45%, log-rank  $P=0.55$ ). There was a substantial difference in survival regarding

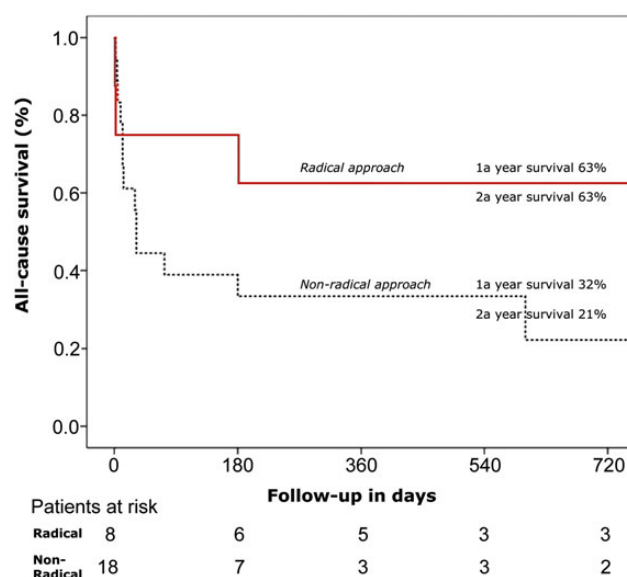**Figure 1:** Overall survival according to the approach.

the conceptual treatment approach being significantly better for a radical approach than for a non-radical approach with regard to overall survival (63 vs 32% and 63 vs 21% at 1 and 2 years, respectively) as well as with regard to fistula-related survival (63 vs 43% and 63 vs 43% at 1 and 2 years, respectively) (Fig. 1).

## COMMENT

ABPF is a rare but highly lethal complication after TEVAR. The leading mechanism behind ABPF seems to be a continuing external compression of either the bronchial tree or left upper lobe parenchyma. In this setting, persisting or newly developing endoleak formation seems to play a crucial role. Prognosis does not differ in patients with central airway or pulmonary parenchymal fistulation. Radical bronchial or pulmonary parenchymal repair in combination with stent graft removal and aortic reconstruction seems to be the most durable treatment strategy.

The incidence of ABPF in this series was very low. This agrees with previously published reports being mainly casuistics [10–13]. The percentage of patients who had previous aortic repair in this series is high and underlines the multisegmental nature of the disease. Atherosclerotic aneurysm formation was the leading indication for primary TEVAR in the majority of patients, followed by chronic type B aortic dissection and traumatic aortic injury. This reflects the distribution of acute and chronic thoracic aortic pathologies as is known in tertiary care centres.

Fifty percent of patients underwent initial emergency TEVAR. As is known from previous European Registry of Endovascular Aortic Repair Complications reports, the incidence of adjacent organ injury is high in patients undergoing emergency TEVAR [7–9]. Reasons are extensive mediastinal haematoma formation, which may compress the oesophagus or the bronchial tree as well as phases of continuing hypotension, thereby causing end-organ ischaemia. As a consequence, staged mediastinal haematoma evacuation to prevent secondary organ fistulation has been recommended previously [9].

The median time interval between initial TEVAR and the development of ABPF was 310 days, suggesting a substantially slower disease process than in aorto-oesophageal fistulation (AOF) where



the time interval between initial TEVAR and the development of AOF was 90 days [9]. The chronic pressure exertion on the bronchus or the pulmonary parenchyma initially does not cause the same injury as it might chronic pressure is exerted on the oesophagus, which is an organ more susceptible to ischaemia. Clinical signs of ABPF corresponded to what would be expected of a leading sign of any kind of haemoptysis. Diagnosis was primarily carried out by CT scanning with an additional 50% of patients undergoing endoscopy for confirmation.

Notably, the number of endoleaks after TEVAR was very high with the majority being type I and type III. There seems to be a direct correlation between aneurysmal sac extension and growth, mediastinal haematoma formation and secondary central airway or pulmonary parenchymal fistulation. As a consequence, correct indications, long landing zones and respecting anatomy in patients scheduled for TEVAR cannot be overemphasized [4]. In addition, we feel that it is important not to scotomize the third option in treating patients with acute and chronic thoracic aortic pathology if open surgery is not an option and TEVAR might represent a trade-off, namely conservative therapy.

Although TEVAR has progressively evolved to become the first choice of thoracic aortic management for several clinical scenarios, many of the current indications are not adequately substantiated and proved. It is vital to verify if these extended indications are reasonable and rational or if they are offered as an option due to the inability to perform regular open surgery. In addition, type I and type III endoleaks have to be regarded as treatment failures, necessitating an urgent management that should not be delayed [4].

However, external compression of the bronchial tree might also occur without endoleak formation. In particular in patients with a very large aneurysm diameter, *per se*, which already alters the geometry of the bronchial tree, TEVAR might further increase pressure exertion due to aneurysmal sac thrombosis with lack of aortic wall elasticity. It was interesting to observe that aneurysm sac diameter in elective patients undergoing TEVAR in this series was impressively large, thereby substantiating this hypothesis. It might be wise to reflect if in these clinical scenarios, an open surgical approach might be the better strategy or to add a saccotomy for decompression during the initial days after TEVAR.

Another factor exacerbating the process might be the additional stenting of major airways already externally compressed. This approach might increase the ischaemic burden of the bronchial wall by exerting additional pressure from inside (Fig. 2) [13]. Oversizing might also play a role especially in patients where graft erosion was the leading mechanism behind ABPF formation [12]. Oversizing is a matter of the underlying pathology, where acute type B aortic dissection will require minimal oversizing and atherosclerotic aneurysms will require more extensive oversizing. Recommended ranges do merely represent approximations learned from adverse events. In general, it might be stated that any kind of oversizing >30% is inappropriate.

A variety of approaches to treat ABPF were chosen in this series ranging from a conservative approach to an orthotopic full fix of the disease process with bronchial and/or pulmonary parenchymal repair, stent graft removal and orthotopic or heterotopic aortic reconstruction. Redo-TEVAR to seal the fistulation from the aortic side was a common treatment strategy as was the combination of redo-TEVAR and any kind of bronchial and/or pulmonary parenchymal repair.

Interestingly, survival in patients with central airway and pulmonary parenchymal ABPF did not differ. One would expect

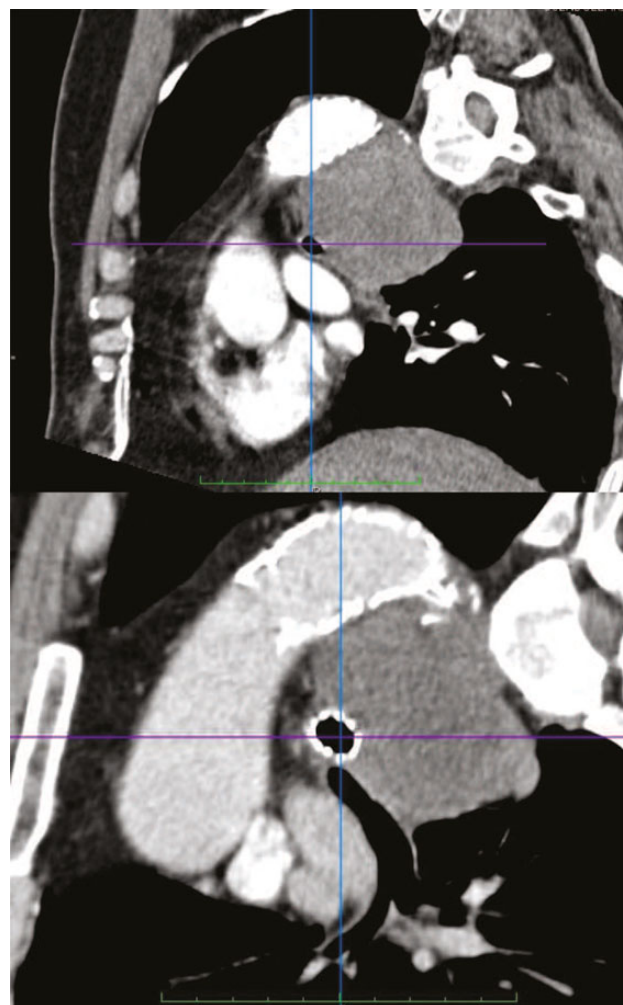

**Figure 2:** Left main bronchus before and after stenting due to compression from the aneurysmal sac as a mechanism of aorto-bronchial fistula formation—axial view.

pulmonary parenchymal fistulas to be the more benign ones but we did not observe that. There was a substantial difference with regard to outcome according to the treatment strategy chosen. Any approach either conservative or interventional with or without bronchial and/or pulmonary parenchymal repair was associated with poor outcome. Merely a radical surgical approach with complete removal of the infected material, bronchial and/or pulmonary parenchymal repair and any kind of orthotopic or heterotopic aortic reconstruction was associated with durable success (Fig. 3) [14]. These findings substantiate the concept that a conservative strategy in patients with graft infection is palliative, although this is currently suggested otherwise [15].

## Limitations and strengths

Without doubt, secondary organ injury is not limited to TEVAR alone and secondary organ fistulation also occurs after open surgery. Patient number is limited and there is a selection bias in this work as this approach to learn about the disease naturally picks only a mere percentage of ABPFs occurring worldwide within the last decade. Furthermore, the treatment strategy is

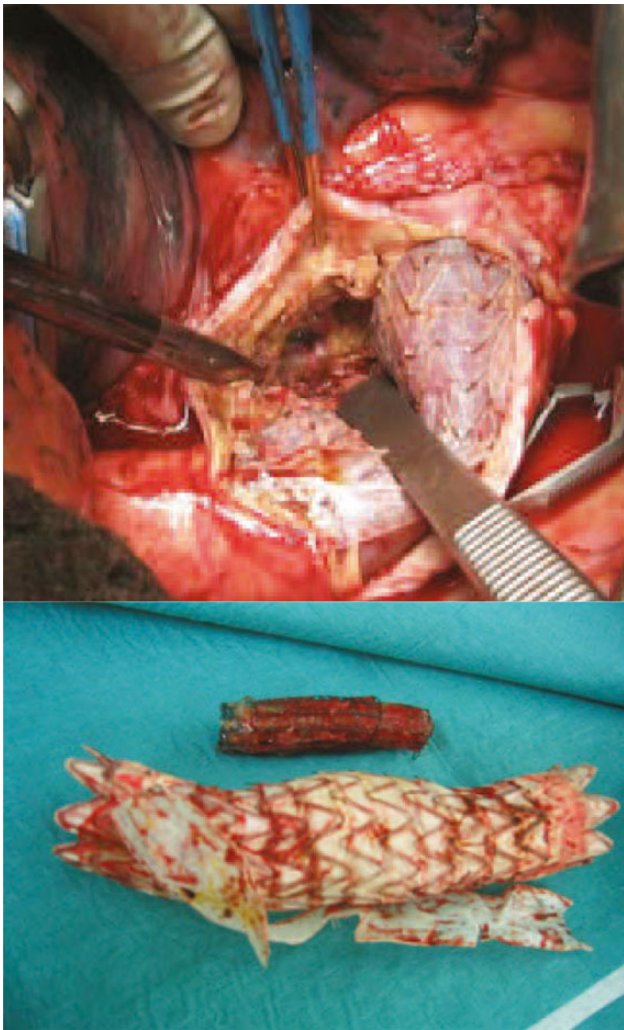

**Figure 3:** Intraoperative view of same patient depicting central airway fistulation as well as explanted stent grafts and explanted bronchial stents.

strongly influenced by the suitability or non-suitability for a radical approach and thereby precludes a full-fix of the problem in many of these patients. Nevertheless, this series was able to present an initial systematic approach to learn about the incidence, underlying mechanisms and effectiveness of treatment strategies. Finally, to the best of our knowledge, this is the first report stratifying ABPF into central airway and pulmonary parenchymal lesions.

In sum, ABPF is a rare but highly lethal complication after TEVAR. The leading mechanism behind ABPF seems to be a continuing external compression of either the bronchial tree or left upper lobe parenchyma. In this setting, persisting or newly developing endoleak formation seems to play a crucial role. Prognosis does not differ in patients with central airway or pulmonary parenchymal fistulation. Radical bronchial or pulmonary parenchymal repair in

combination with stent graft removal and aortic reconstruction seems to be the most durable treatment strategy.

**Conflict of interest:** none declared.

## REFERENCES

- [1] Grimm M, Loewe C, Gottardi R, Funovics M, Zimpfer D, Rodler S *et al.* Novel insights into the mechanisms and treatment of intramural hematoma affecting the entire thoracic aorta. *Ann Thorac Surg* 2008;86: 453–6.
- [2] Czerny M, Funovics M, Sodeck G, Dumfarth J, Schoder M, Juraszek A *et al.* Long-term results of thoracic endovascular aortic repair in atherosclerotic aneurysms involving the descending aorta. *J Thorac Cardiovasc Surg* 2010; 140(6 suppl):S179–84.
- [3] Nienaber CA, Kische S, Rousseau H, Eggebrecht H, Rehders TC, Kundt G *et al.* INSTEAD-XL trial. Endovascular repair of type B aortic dissection: long-term results of the randomized investigation of stent grafts in aortic dissection trial. *Circ Cardiovasc Interv* 2013;6:407–16.
- [4] Dumfarth J, Michel M, Schmidli J, Sodeck G, Ehrlich M, Grimm M *et al.* Mechanisms of failure and outcome of secondary surgical interventions after thoracic endovascular aortic repair (TEVAR). *Ann Thorac Surg* 2011; 91:1141–6.
- [5] Canaud L, Ozdemir BA, Patterson BO, Holt PJ, Loftus IM, Thompson MM. Retrograde aortic dissection after thoracic endovascular aortic repair. *Ann Surg*. 2014;260:389–95.
- [6] Törnqvist P, Resch T. Endoleaks after EVAR and TEVAR: indications for treatment and techniques. *J Cardiovasc Surg* 2014;55(2 Suppl 1):105–14.
- [7] Eggebrecht H, Thompson M, Rousseau H, Czerny M, Lönn L, Mehta RH *et al.* European Registry on Endovascular Aortic Repair Complications. Retrograde ascending aortic dissection during or after thoracic aortic stent graft placement: insight from the European registry on endovascular aortic repair complications. *Circulation* 2009;120(11 Suppl):S276–81.
- [8] Czerny M, Eggebrecht H, Sodeck G, Verzini F, Cao P, Maritati G *et al.* Mechanisms of symptomatic spinal cord ischemia after TEVAR: insights from the European Registry of Endovascular Aortic Repair Complications (EuREC). *J Endovasc Ther* 2012;19:37–43.
- [9] Czerny M, Eggebrecht H, Sodeck G, Weigang E, Livi U, Verzini F *et al.* New insights regarding the incidence, presentation and treatment options of aorto-oesophageal fistulation after thoracic endovascular aortic repair: the European Registry of Endovascular Aortic Repair Complications. *Eur J Cardiothorac Surg* 2014;45:452–7.
- [10] Luehr M, Etz CD, Nozdrzykowski M, Garbade J, Lehmkuhl L, Schmidt A *et al.* Emergency open surgery for aorto-oesophageal and aorto-bronchial fistulae after thoracic endovascular aortic repair: a single-centre experience. *Eur J Cardiothorac Surg* 2015;47:374–83.
- [11] Chiesa R, Melissano G, Marone EM, Marrocco-Trischitta MM, Kahlberg A. Aorto-oesophageal and aortobronchial fistulae following thoracic endovascular aortic repair: a national survey. *Eur J Vasc Endovasc Surg* 2010;39: 273–9.
- [12] Hyhlik-Dürr A, Geisbüsch P, Hakimi M, Weber TF, Schaible A, Böckler D. Endovascular aortic surgery: management of secondary aortobronchial and aorto-enteral fistulas. *Chirurg* 2009;80:947–55.
- [13] Abdul-Ghani A, Pisipati S, McWilliams R, Page RD. Aorto-bronchial fistula following aortic and bronchial stenting of a thoracic aneurysm. *Eur J Cardiothorac Surg* 2006;29:419–21.
- [14] Czerny M, von Allmen R, Opfermann P, Sodeck G, Dick F, Stellmes A *et al.* Self-made pericardial tube graft: a new surgical concept for treatment of graft infections after thoracic and abdominal aortic procedures. *Ann Thorac Surg* 2011;92:1657–62.
- [15] de Donato G, Setacci F, Galzerano G, Ruzzi U, Borrelli MP, Mazzitelli G *et al.* Prosthesis infection: prevention and treatment. *J Cardiovasc Surg* 2014;55:779–92.
